# Supplementary material for: A New Synthetic Curcuminoid Displays Antitumor Activities in Metastasized Melanoma
Source: MDPI journal article supplement (doi:10.3390/cells12222619), 2023-11-13
Supplement: s1 [file s1]

## Supplementary Materials

### A New Synthetic Curcuminoid Displays Antitumor Activities in Metastasized Melanoma

Leonard Kaps <sup>1,\*†</sup>, Adrian Klefenz <sup>1,†</sup>, Henry Traenckner <sup>1</sup>, Paul Schneider <sup>1</sup>, Ion Andronache <sup>2</sup>, Rainer Schobert <sup>3</sup>, Bernhard Biersack <sup>3,\*</sup> and Detlef Schuppan <sup>1,4,\*</sup>

<sup>1</sup> Institute of Translational Immunology, University Medical Center, Johannes Gutenberg University Mainz, Germany; leonard.kaps@unimedizin-mainz.de, detlef.schuppan@unimedizin-mainz.de

<sup>2</sup> Research Center for Integrated Analysis and Territorial Management, University of Bucharest, Romania; ion.andronache@geo.unibuc.ro

<sup>3</sup> Organic Chemistry 1, University Bayreuth, Germany; rainer.schobert@uni-bayreuth.de, bernhard.biersack@yahoo.com

<sup>4</sup> Division of Gastroenterology, Beth Israel Deaconess Medical Center, Harvard Medical School, Boston, MA, USA

\* Correspondence: leonard.kaps@unimedizin-mainz.de (L. K.), bernhard.biersack@yahoo.com (B. B.), detlef.schuppan@unimedizin-mainz.de (D. S.)

† These authors contributed equally to this work.

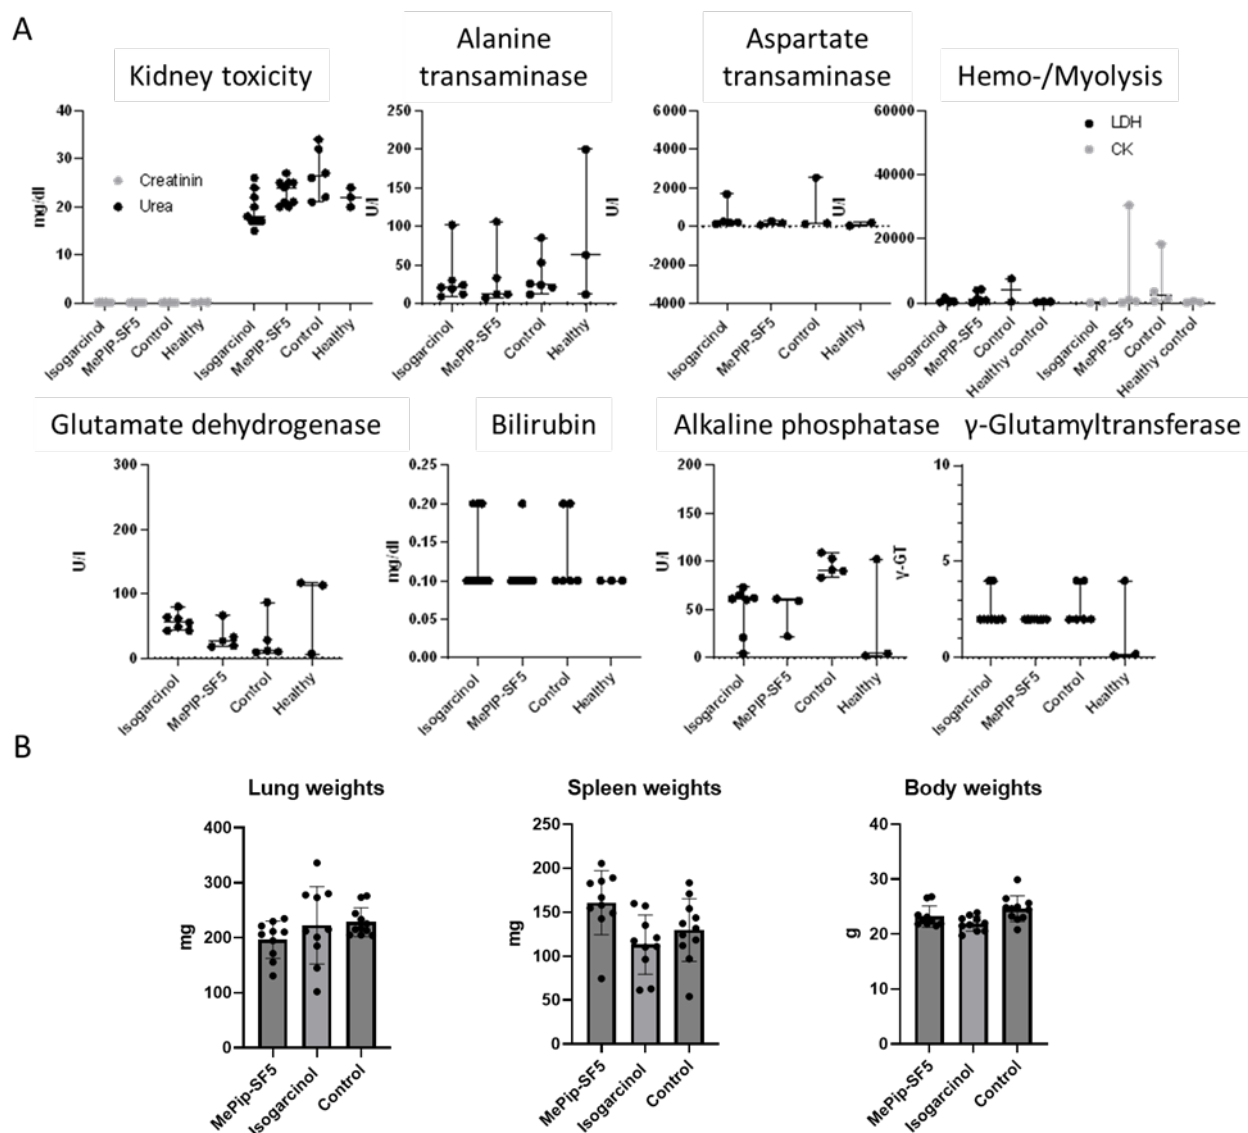

**Figure S1.** (A) Safety laboratory parameters of sera from (un)treated and healthy mice; (B) Biometric data of mice at sacrifice.
